# Supplementary material
Source: Elsevier journal article supplement (http://library.osu.edu/projects/msa/suppmat/v259.i1.pp26-38/mmc2.pdf)
Supplement: mmc2 [file mmc2.pdf]

Table S2. Summary of the measured  $|m|=3$ ,  $|K|=1$  doublet transitions for toluene of the type used in Ref.[8] in their first determination of the six-fold barrier to internal rotation of the methyl group.

|          |          | m=3, $K_c=1$ |         |           |          |          | m=-3, $K_a=1$ |         |           |  |  |
|----------|----------|--------------|---------|-----------|----------|----------|---------------|---------|-----------|--|--|
|          |          | this work    |         | Ref.[8]   |          |          | this work     |         | Ref.[8]   |  |  |
|          |          | obs./MHz     | o-c/kHz |           |          |          | obs./MHz      | o-c/kHz |           |  |  |
| A2 2 1 1 | A1 1 0 1 | 7967.0542    | -2.9    |           | A1 2 1 2 | A2 1 1 1 | 7977.7921     | 4.3     |           |  |  |
| A1 2 2 1 | A2 1 1 1 | 9086.8284    | 3.7     |           | A2 2 1 1 | A1 1 1 0 | 9097.4572     | 0.3     |           |  |  |
| A1 3 2 1 | A2 2 1 1 | 12013.2625   | -2.7    | 12013.284 | A2 3 1 3 | A1 2 1 2 | 11954.9221    | -3.7    | 11955.096 |  |  |
| A2 3 3 1 | A1 2 2 1 | 13685.1489   | 2.3     | 13685.191 | A1 3 1 2 | A2 2 1 1 | 13632.9094    | -1.1    | 13632.894 |  |  |
| A2 4 3 1 | A1 3 2 1 |              |         |           | A1 4 1 4 | A2 3 1 3 | 15919.4783    | -2.5    |           |  |  |
| A1 4 4 1 | A2 3 3 1 | 18339.0350   | 1.6     |           | A2 4 1 3 | A1 3 1 2 | 18151.0691    | 2.4     |           |  |  |
| A1 5 4 1 | A2 4 3 1 | 20404.0019   | -0.9    |           | A2 5 1 5 | A1 4 1 4 | 19869.8834    | -1.9    |           |  |  |
| A2 5 5 1 | A1 4 4 1 | 23052.7093   | 1.4     |           | A1 5 1 4 | A2 4 1 3 | 22643.9567    | 0.5     |           |  |  |
| A2 6 5 1 | A1 5 4 1 | 24852.0239   | -0.3    |           | A1 6 1 6 | A2 5 1 5 | 23807.0282    | -2.7    |           |  |  |
